# Supplementary material for: Effect of adjunctive ranitidine for antipsychotic-induced weight gain: A systematic review of randomized placebo-controlled trials
Source: PubMed Central journal article supplement — J Int Med Res. 2017 Jul 18;46(1):22–32. doi: 10.1177/0300060517716783 (PMC6011279; doi:10.1177/0300060517716783), 2017-07-18
Supplement: Supplemental_material.pdf [file Supplemental_material.pdf]

**Supplementary Figure 1. Risk of bias summary**

|              | Random sequence generation (selection bias) | Allocation concealment (selection bias) | Blinding of participants and personnel (performance bias) | Blinding of outcome assessment (detection bias) | Incomplete outcome data (attrition bias) | Selective reporting (reporting bias) | Other bias |
|--------------|---------------------------------------------|-----------------------------------------|-----------------------------------------------------------|-------------------------------------------------|------------------------------------------|--------------------------------------|------------|
| Liang 2016   | +                                           | ?                                       | +                                                         | +                                               | +                                        | ?                                    | ?          |
| Mehta 2014   | +                                           | -                                       | -                                                         | -                                               | +                                        | +                                    | ?          |
| Ranjbar 2013 | +                                           | +                                       | +                                                         | +                                               | +                                        | +                                    | ?          |
| Sun 2007     | +                                           | +                                       | +                                                         | +                                               | ?                                        | ?                                    | ?          |
